# Supplementary material for: Whole Blood Stimulation Assay as a Treatment Outcome Monitoring Tool for VL Patients in Ethiopia: A Pilot Evaluation
Source: Hindawi journal article supplement (doi:10.1155/2020/8385672), 2020-01-01
Supplement: f1 [file 8385672.f1.pdf]

## Supplementary Material

Supplementary Table 1 showed the levels of cytokines and chemokines produced after PHA-stimulation whole blood from VL patients in the active moment, during the treatment and the end of treatment.

**Supplementary table 1.** Median concentration (pg/ml) (IQR) of cytokine/chemokine after PHA stimulation of 13 VL patients from Gondar, Ethiopia.

| <b>Cytokine/<br/>Chemokine</b> | <b>D0</b>         | <b>W1</b>                         | <b>EOT</b>                                 |
|--------------------------------|-------------------|-----------------------------------|--------------------------------------------|
| IFN- $\gamma$                  | 0.1 (0-5.54)      | 2.52 (0.39-3.71)                  | 3.39 (1.56-15-27) <sup>b*</sup>            |
| TNF- $\alpha$                  | 8.03 (5.19-19-74) | 62.00 (8.81-214.3) <sup>a**</sup> | 206.50 (114.9-726.7) <sup>b****, c**</sup> |
| IP-10                          | 5.19 (0-73.10)    | 34.26 (1.53-112.90)               | 122.10 (39.70-842.10) <sup>b**</sup>       |

<sup>a</sup> D0 vs W1

<sup>b</sup> D0 vs EOT

<sup>c</sup> W1 vs EOT

D0: active moment of the disease; W1: one week during the treatment; EOT: end of treatment. \* $p < 0.05$ ; \*\* $p < 0.01$ ; \*\*\*\* $p < 0.0001$ .

In the supplementary Figure 1, we showed the fold change in each cytokine/chemokine concentration after one week of treatment (W1) and at the end of the treatment (EOT), in relation to their concentration at the time of active disease (D0) after SLA-stimulation from *L. infantum*.

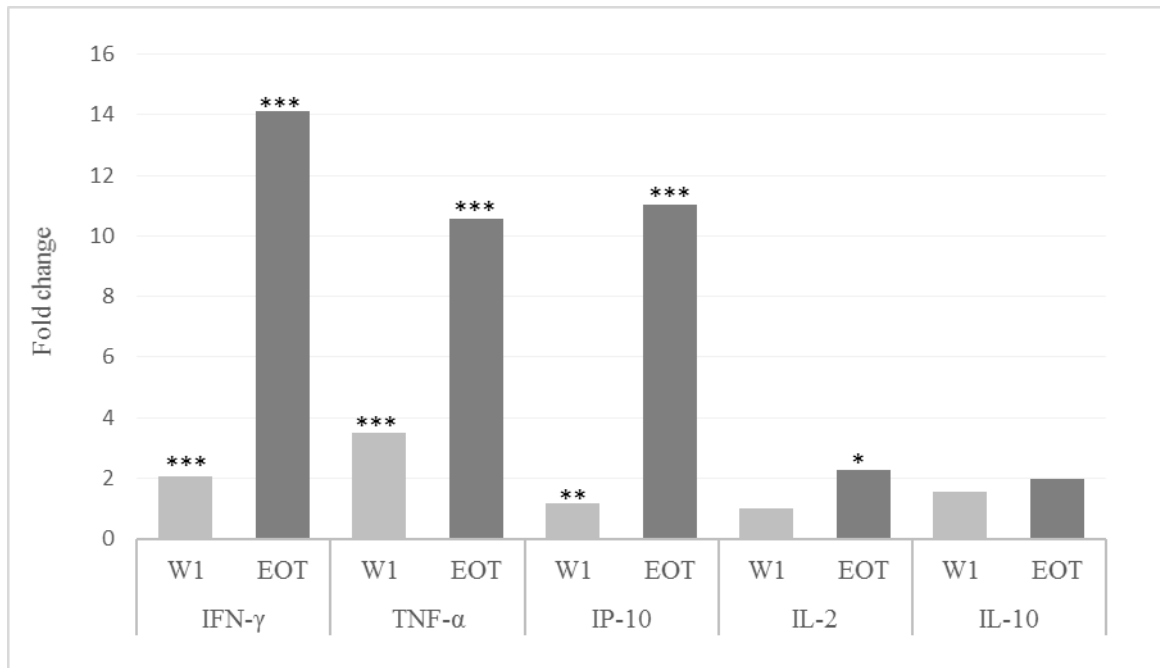

**Supplementary figure 1.** Fold changes in cytokine/chemokine concentrations during treatment of 13 VL patients, measured in soluble *L. infantum* antigen stimulated plasma. Fold increase during W1 and EOT compared to D0 was calculated by dividing the value of (W1, EOT) by D0 values. P values are represented for comparison with time of diagnosis (D0). \* $p < 0.05$ ; \*\* $p < 0.01$ ; \*\*\* $p < 0.001$ .
